# Supplementary material
Source: publisher site journal article supplement (https://www.dovepress.com/article/236683)
Supplement: Supplementary file 1 [file get_supplementary_file.php]

**Supporting Information**

**Functionalized gold and silver bimetallic nanoparticles using *Deinococcus radiodurans* protein extract mediate degradation of toxic dye malachite green**

Yulan Weng 1, Jiulong Li 1, Xingcheng Ding 2, Binqiang Wang 1, Shang Dai 1, Yulong Zhou 3, Renjiang Pang 1, Ye Zhao 1, Hong Xu 1, Bing Tian 1,3 *, Yuejin Hua 1

1 MOE Key Laboratory of Biosystems Homeostasis & Protection, Zhejiang University, Hangzhou, China;

2 Zhejiang Runtu Chemical Research Institute, Shaoxing, China;

3 Key Laboratory for Green Processing of Chemical Engineering of Xinjiang Bingtuan, School of Chemistry and Chemical Engineering, Shihezi University, Shihezi, Xinjiang, China;

*Corresponding author: tianbing@zju.edu.cn (BT)

Zhejiang University, 866 Yuhangtang Road, Zijingang campus west part, A403 Biophysics Building, Hangzhou 310058,  P.R.China

Tel/Fax: +86-571-86971215

**Figure S1.** Biosynthesis of Drp-Au-AgNPs.

**Notes:** (a) Absorbance spectra from 350 to 600 nm of the solution containing: Drp-AgNPs, Drp-AgNPs+Au(III), and the formed Drp-Au-AgNPs, respectively. (b) SEM–EDS profile of the Drp-Au–AgNPs. The peak of Al arose from the mesh on which the samples were spotted.

**Abbreviations:** Drp-Au-AgNPs, *D. radiodurans* protein extract-mediated gold-silver bimetallic nanoparticles; *D. radiodurans, Deinococcus radiodurans;* Drp-AgNPs, *D. radiodurans* protein extract-mediated silver nanoparticles; SEM, scanning electron microscope; EDS, energy dispersion X-ray spectroscopy.


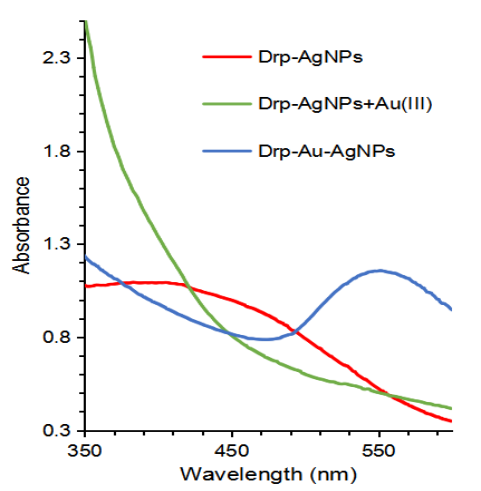


(a)


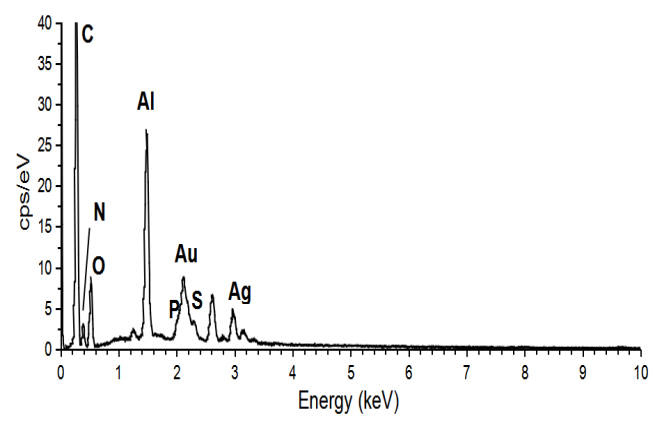


(b)

**Figure S2.** XPS analysis of *D. radiodurans* protein extract

Notes: (a) Full scan spectrum and the core level (b) C1s, (c) O1s and (d) N1s of the protein extract. The peak with red line is the fitting peak of each dipole peaks.

**Abbreviations:** XPS, X-ray photoelectron spectroscopy; *D. radiodurans, Deinococcus radiodurans.*


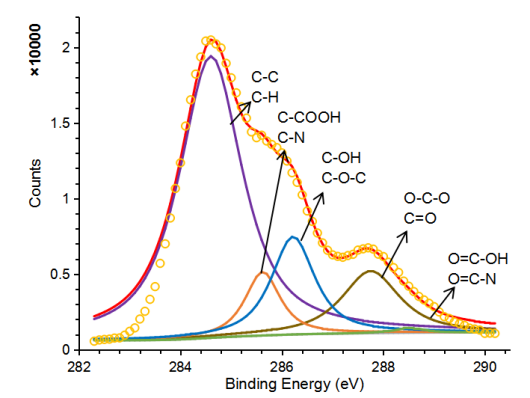

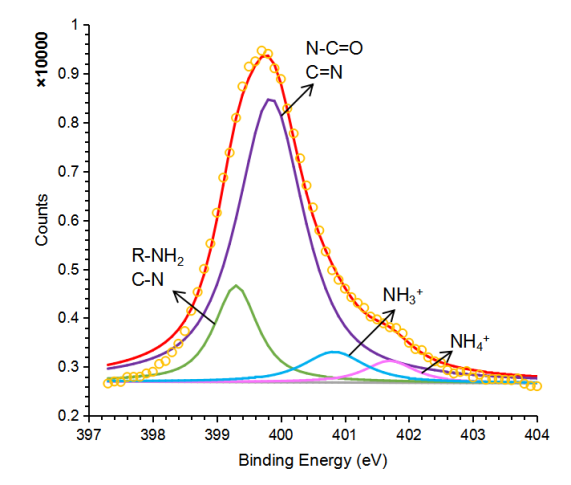

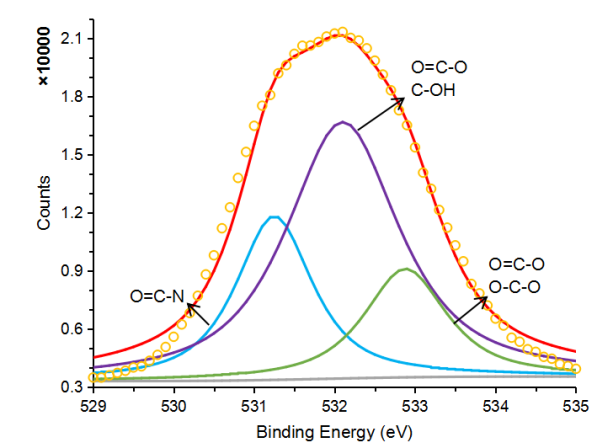

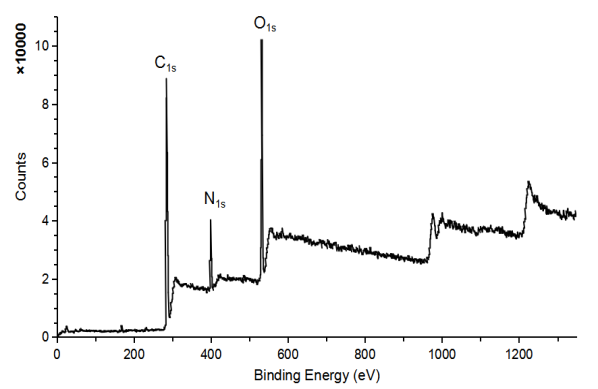


(d)

(c)

(b)

(a)

**Figure S3.** XPS analyses of the recycled Drp-Au-AgNPs

Notes: (a) Full scan spectrum of recycled NPs and core level of (b) Au4f, (c) Ag3d, (d) C1s, (e) O1s and (f) N1s. The peak with red line is the fitting peak of each dipole peaks.

**Abbreviations:** XPS, X-ray photoelectron spectroscopy; Drp-Au-AgNPs, *D. radiodurans* protein extract-mediated gold-silver bimetallic nanoparticles; *D. radiodurans, Deinococcus radiodurans.*

(b)

(a)


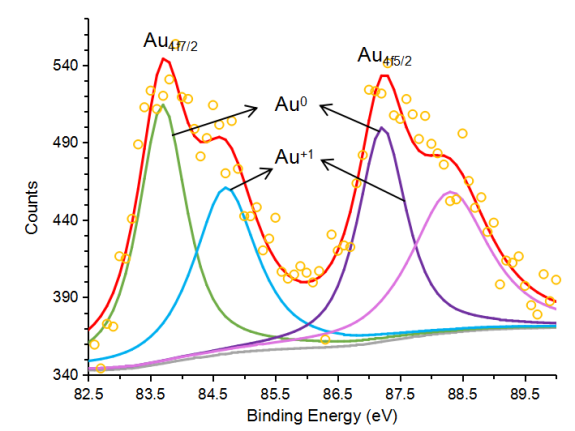

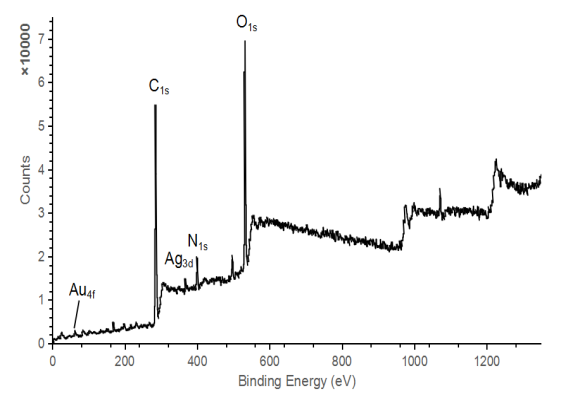


(c)

(d)


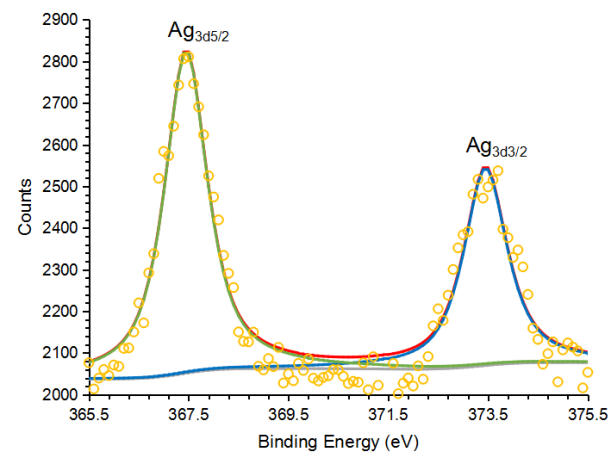


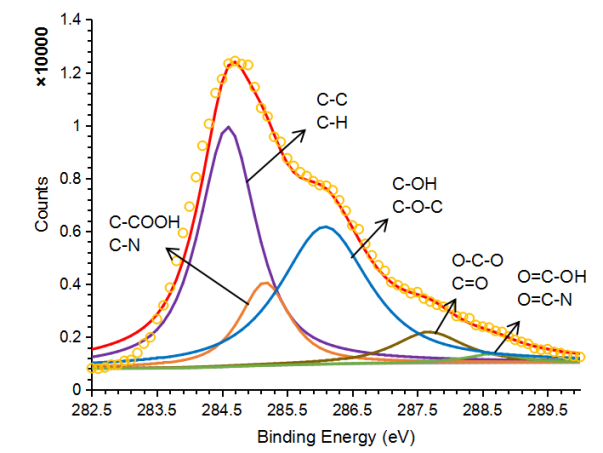

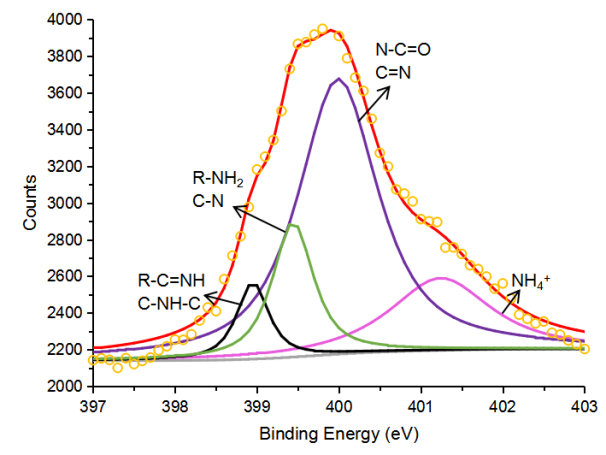

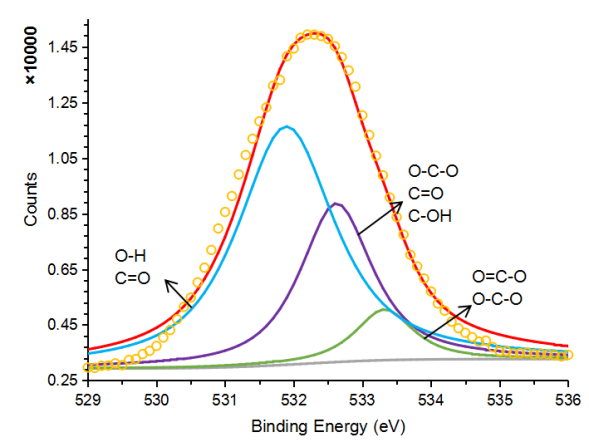


(f)

(e)

**Table S1.** SEM-EDS analyses of Drp-Au-AgNPs

| element | mass (%) | normalized mass (%) | atom (%) | abs.error (%) | rel.error (%) |
| --- | --- | --- | --- | --- | --- |
| Carbon | 19.43 | 42.49 | 63.92 | 2.38 | 12.27 |
| Nitrogen | 4.60 | 10.06 | 12.97 | 0.83 | 18.09 |
| Oxygen | 7.17 | 15.68 | 17.71 | 1.05 | 14.65 |
| Phosphorus | 0.77 | 1.68 | 0.98 | 0.06 | 7.65 |
| Sulfur | 0.75 | 1.65 | 0.93 | 0.06 | 7.54 |
| **Silver** | **5.33** | **11.66** | **1.95** | **0.20** | **3.81** |
| **Gold** | **7.68** | **16.79** | **1.54** | **0.32** | **4.19** |
| Total | 45.74 | 100.00 | 100.00 |  |  |

**Note: The bold values represent the mass (%), normalized mass (%), atom (%), abs.error (%) and rel.error (%) of silver and gold, respectively.**

**Abbreviations:** SEM, scanning electron microscope; EDS, energy dispersion X-ray spectroscopy; Drp-Au-AgNPs, *D. radiodurans* protein extract-mediated gold-silver bimetallic nanoparticles; *D. radiodurans, Deinococcus radiodurans.*

**Table S2.** XPS analyses of the core level of C1s, O1s and N1s of Drp, NPs and re-NPs

| **element** | **Drp-binding**  **energy (eV)** | **NPs-binding**  **energy (eV)** | **re-NPs-binding energy (eV)** | **functional groups and related**  **amino acid(s)** |
| --- | --- | --- | --- | --- |
| **C1s** | 284.6 | 284.6 | 284.6 | C-C |
| C-H |
| 285.6 | 285.7 | 285.2 | C-COOH (Asp, Glu) |
| C-N (Trp, Pro, Arg) |
| 286.2 | 286.5 | 286.1 | C-OH (Ser, Thr, Tyr) |
| C-O-C |
| 287.8 | 287.9 | 287.7 | O-C-O  (unstable C=O+H2O) |
| C=O (all amino acids) |
| 288.5 | 288.7 | 288.7 | O=C-OH (Asp, Glu) |
| O=C-N (peptide bond) |
| **element** | **Drp-binding**  **energy (eV)** | **NPs-binding energy (eV)** | **re-NPs-binding**  **energy (eV)** | **functional groups and related**  **amino acid(s)** |
| **O1s** | 531.3 | 531.4 | - | O=C-N (peptide bond) |
| - | - | 531.9 | C=O (all amino acids) |
| OH- |
| 532.1 | 532.3 | 532.6 | O=C-O (all amino acids) |
| C-OH (Ser, Thr, Tyr) |
| 532.9 | 533.1 | 533.3 | O=C-O (all amino acids) |
| O-C-O (unstable  C=O+H2O) |
| **element** | **Drp-binding energy (eV)** | **NPs-binding**  **energy (eV)** | **re-NPs-binding**  **energy (eV)** | **functional groups and related**  **amino acid(s)** |
| **N1s** | - | - | 399.0 | R-C=NH (Arg) |
| C-N-C (Arg, His, Pro, Trp) |
| 399.3 | 399.4 | 399.4 | R-NH2 (Arg, Gln, Asn) |
| C-N (Trp, Pro, Arg) |
| 399.8 | 399.8 | 400 | N-C=O (peptide bond) |
| C=N (Arg, His) |
| 400.8 | - | - | NH3+ (Lys) |
| 401.7 | - | 401.2 | NH4+ |

**Notes:** Binding energy corresponds to functional groups and related amino-acids.

**Abbreviations:** XPS, X-ray photoelectron spectroscopy; Drp, protein extracts, NPs, Drp-Au-AgNPs; re-NPs, recycled Drp-Au-AgNPs; Drp-Au-AgNPs, *D. radiodurans* protein extract-mediated gold-silver bimetallic nanoparticles; *D. radiodurans, Deinococcus radiodurans*.
